# Supplementary material
Source: publisher figshare collection journal article supplement (https://karger.figshare.com/articles/dataset/_/5123971)
Supplement: Supplementary file 1 [file 1]

| Gene       |         | Primer Sequence                | Amplicon Size |
|------------|---------|--------------------------------|---------------|
| Beta Actin | Forward | 5'-CCAACCGTGAAAAGATGACC-3'     | 106 bp        |
|            | Reverse | 5'-GTGGTACGACCAGAGGCATAC-3'    |               |
| TRPC1      | Forward | 5'-AAAGTGGTGGCTCACAACAA-3'     | 103 bp        |
|            | Reverse | 5'-CGTTTGCAAAAGCAAAAAGC-3'     |               |
| TRPC2      | Forward | 5'-TTGCCTTCCTCATCTTCCTCACCA-3' | 290 bp        |
|            | Reverse | 5'-CCGCAAGCCCTCGATCCACACCT-3'  |               |
| TRPC3      | Forward | 5'-GGCTTTCATGATTGGCATGT-3'     | 107 bp        |
|            | Reverse | 5'-TGGACCAAAACAAAGTCTTGAA-3'   |               |
| TRPC4      | Forward | 5'-TGACGGAGGAGGATGTTAAGG-3'    | 110 bp        |
|            | Reverse | 5'-CGCGTTGGCTGACTGTATT-3'      |               |
| TRPC5      | Forward | 5'-GGCGATGCATTACTCTACGC-3'     | 107 bp        |
|            | Reverse | 5'-ATCATCAGCGTGGGAACC-3'       |               |
| TRPC6      | Forward | 5'-ACTGGTGTGCTCCTTGCA-3'       | 118 bp        |
|            | Reverse | 5'-TCAGCTGCATTCATGACGA-3'      |               |
| TRPC7      | Forward | 5'-AATGGCGATGTGAACTTGC-3'      | 110 bp        |
|            | Reverse | 5'-CAGTTAGGGTGAGCAACGAAC-3'    |               |
| BKCa       | Forward | 5'-CTGCCGCATTCAGACTCTC-3'      | 141 bp        |
|            | Reverse | 5'-TTGCTGCTCCTTGGCTCT-3'       |               |

Supplemental Table: PCR primers for qRT-PCR
